# Supplementary material
Source: MDPI journal article supplement (https://www.mdpi.com/2673-9879/4/1/3)
Supplement: s1 [file s1]

Archive with 2 entries (2 files):
- Figure S1.tiff
- futurepharmacol-2667302-supplementary.pdf
